# Supplementary material for: Synthesis of Spirocyclopropane-Containing 4H-Pyrazolo[1,5-a]indoles via Alkylative Dearomatization and Intramolecular N-Imination of an Indole–O-(Methylsulfonyl)oxime
Source: MDPI journal article supplement (doi:10.3390/molecules28176374), 2023-08-31

# **$^1\text{H}$ and $^{13}\text{C}$ NMR Spectra of the Synthesized Compounds**

**9, 10, 13, 11, and 6a–e**

## Instrumental section

Proton (300 MHz) and carbon-13 (75 MHz) NMR spectra were recorded on a Varian Mercury-300 spectrometer at room temperature using  $\text{CDCl}_3$  as the solvent. Proton chemical shifts are referenced to the residual  $\text{CHCl}_3$  ( $\delta$  7.26 ppm) in  $\text{CDCl}_3$ . Carbon-13 chemical shifts are referenced to the center of the  $\text{CDCl}_3$  triplet ( $\delta$  77.0 ppm). Multiplicities are abbreviated as follows: s, singlet; d, doublet; t, triplet; q, quartet; m, multiplet;  $J$ , coupling constant (hertz).

# 1,2,3,5,6,11-Hexahydrocyclopenta[2,3]oxepino[4,5-*b*]indole (9)

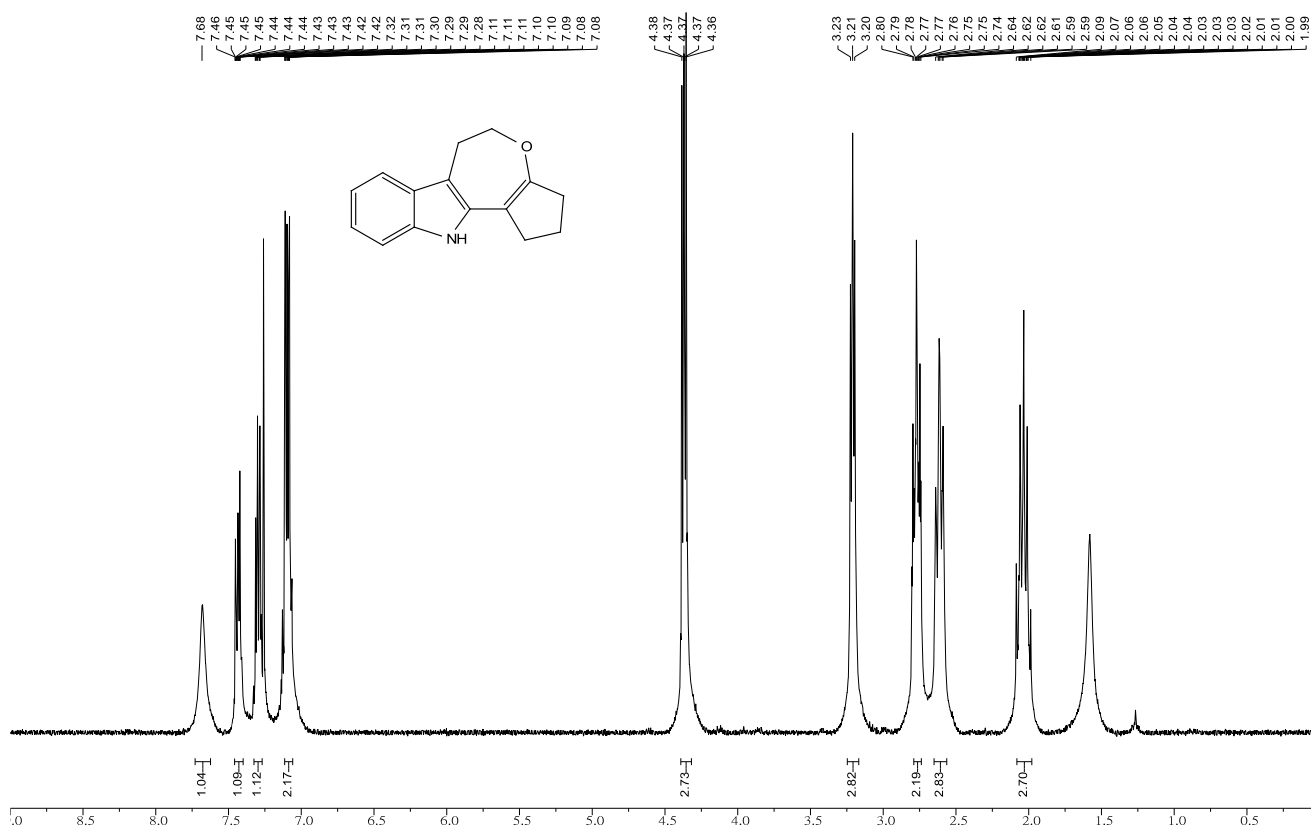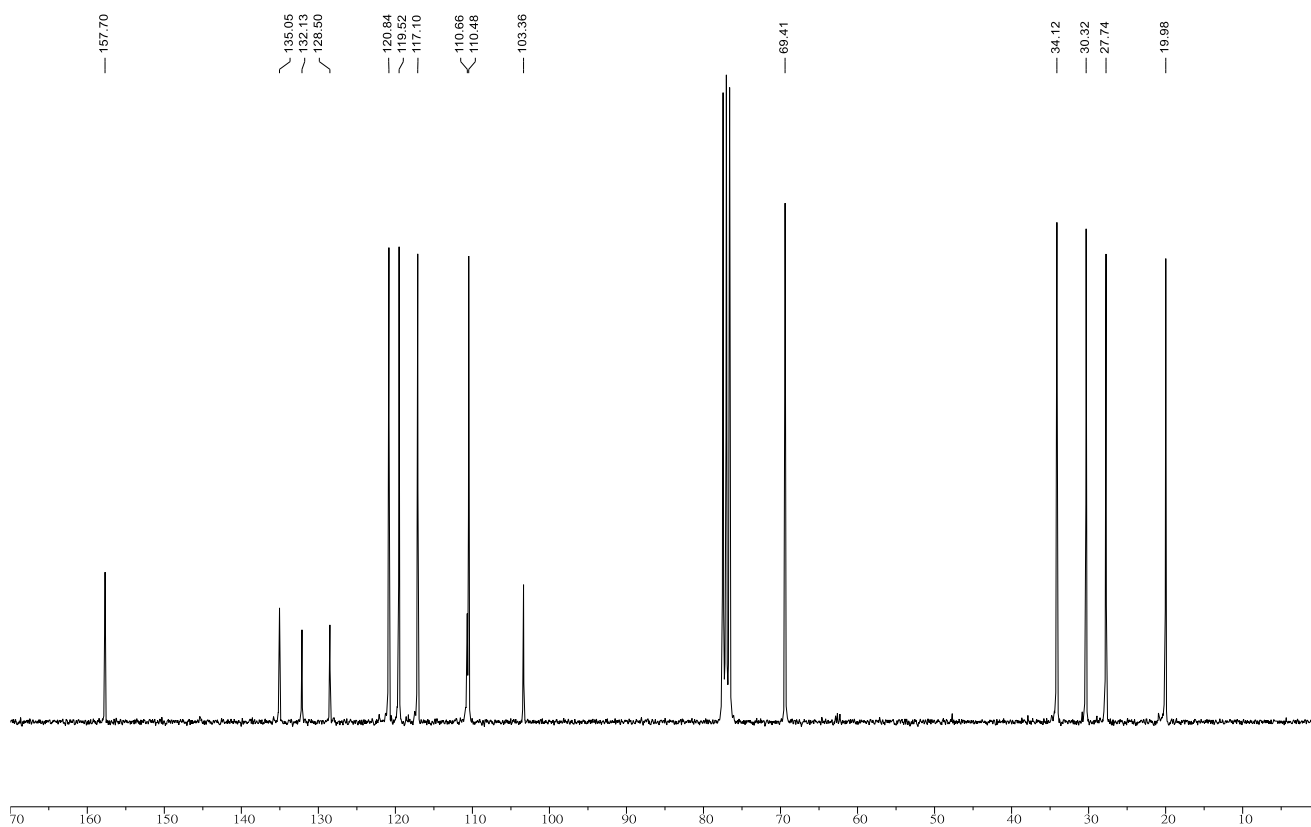

**(E)-2-[3-(2-Hydroxyethyl)-1*H*-indol-2-yl]cyclopent-2-en-1-one Oxime (10)**

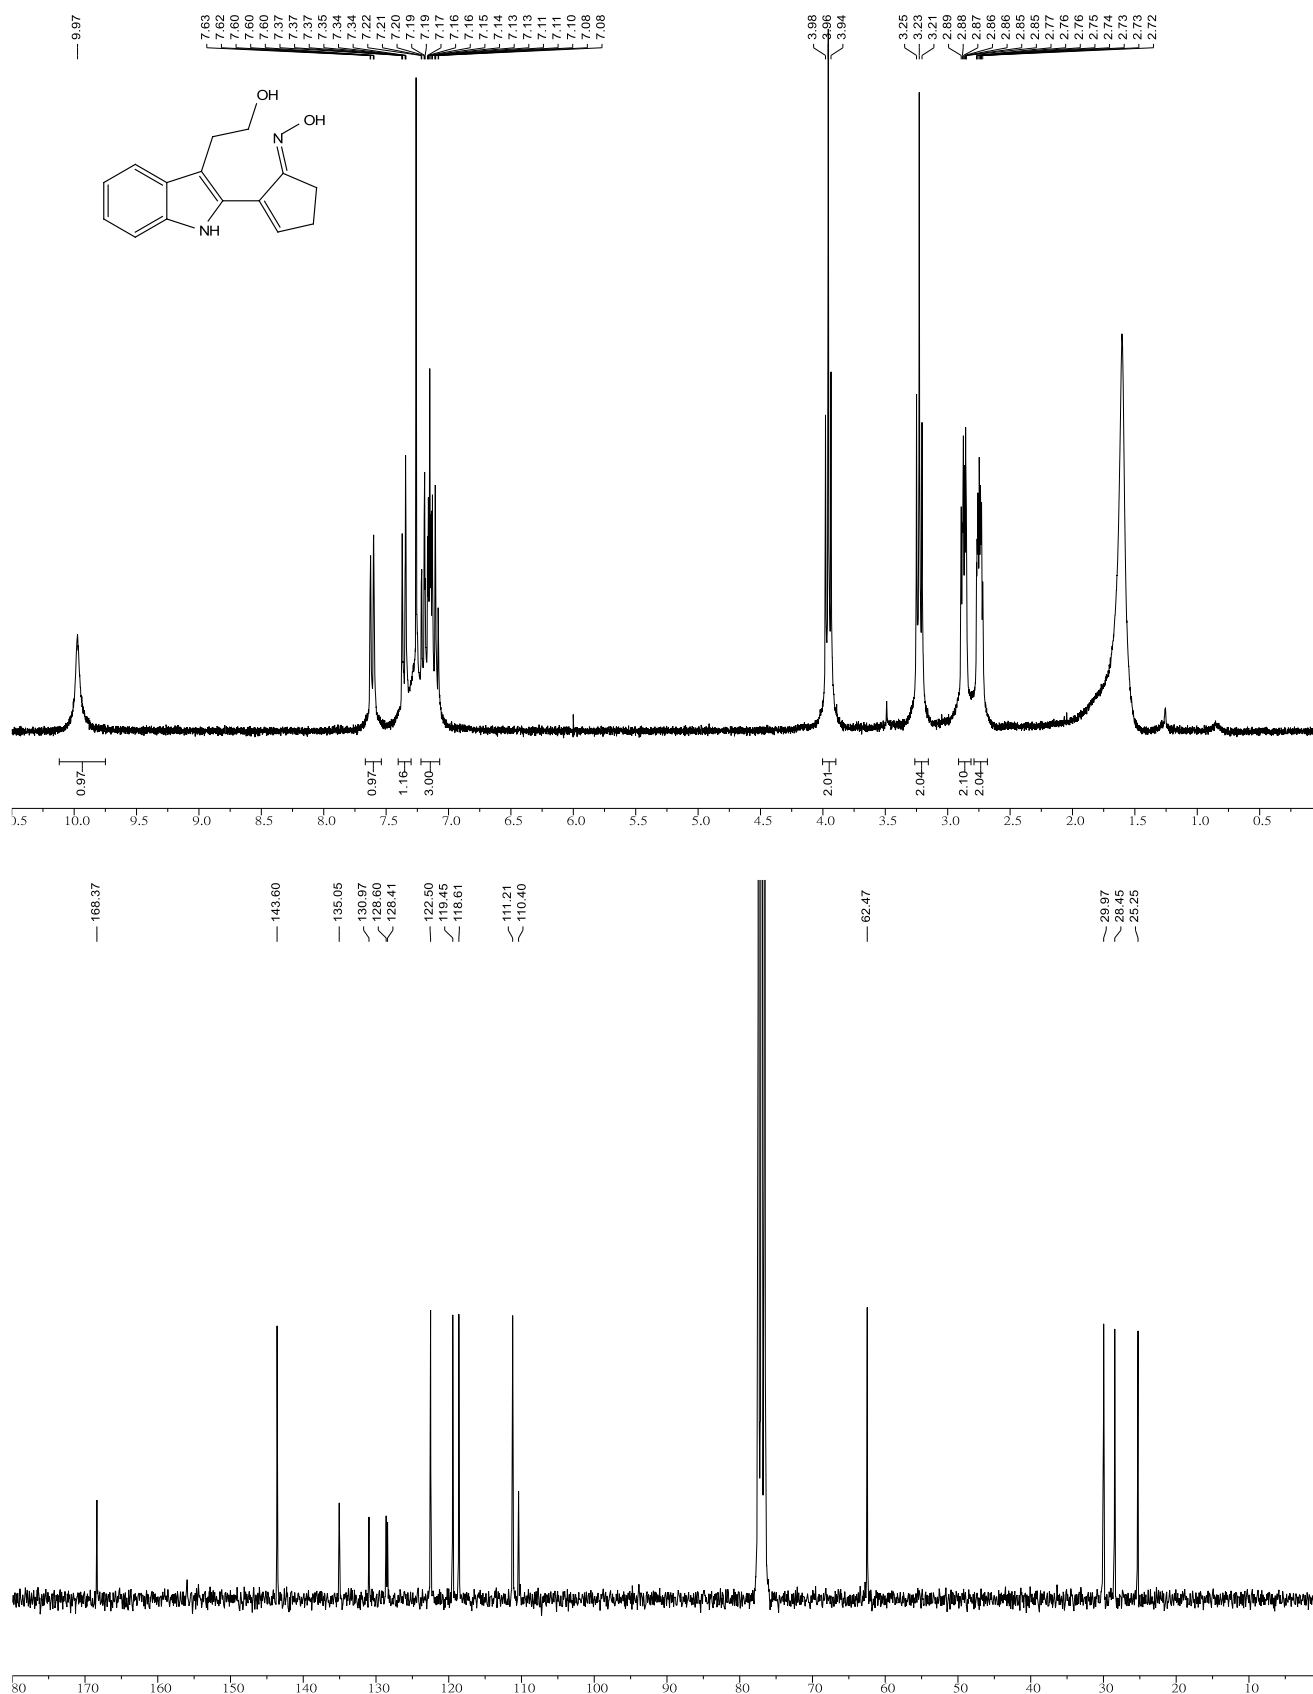

**2-[3-(2-Hydroxyethyl)-1H-indol-2-yl]cyclopent-2-en-1-one (13)**

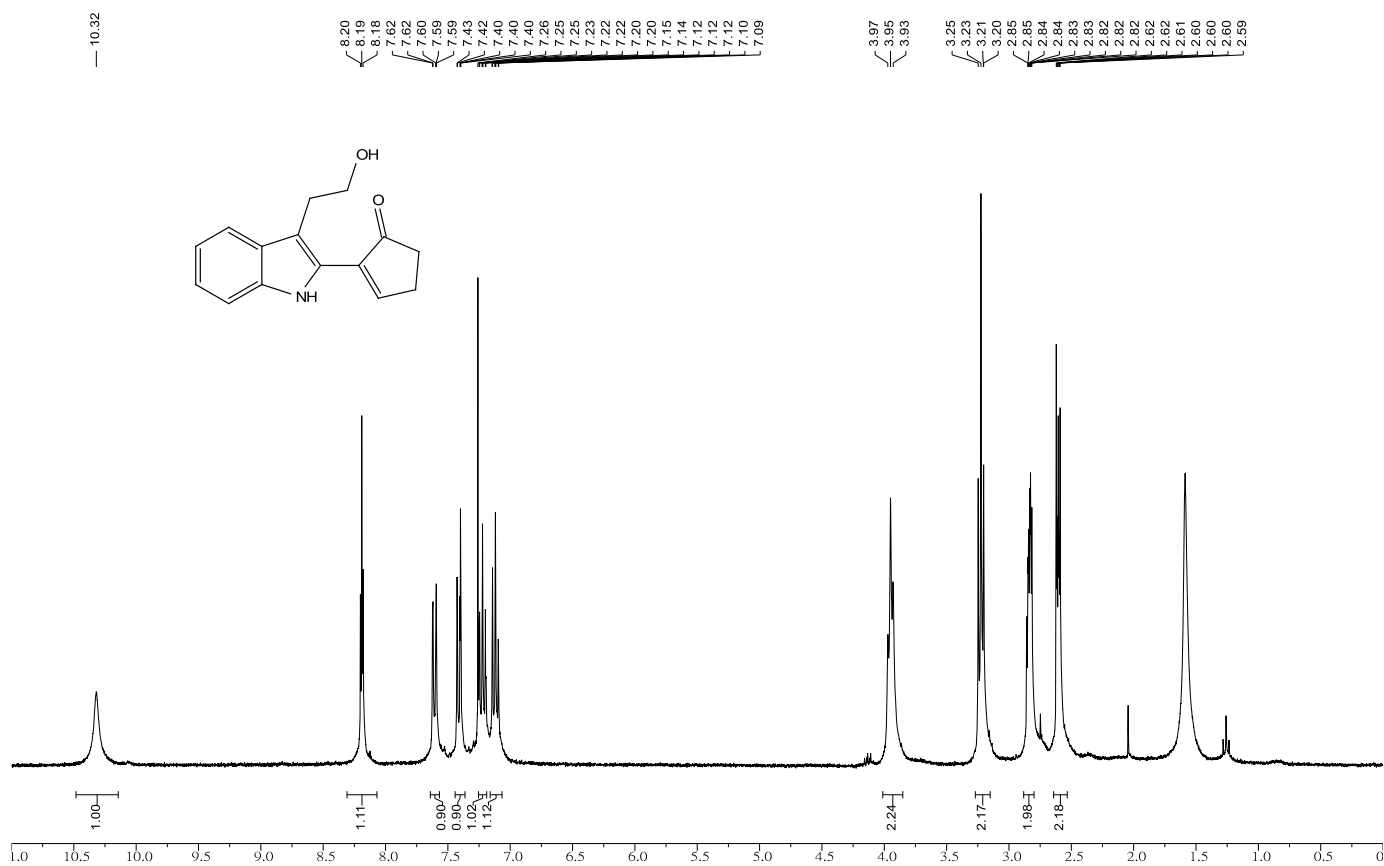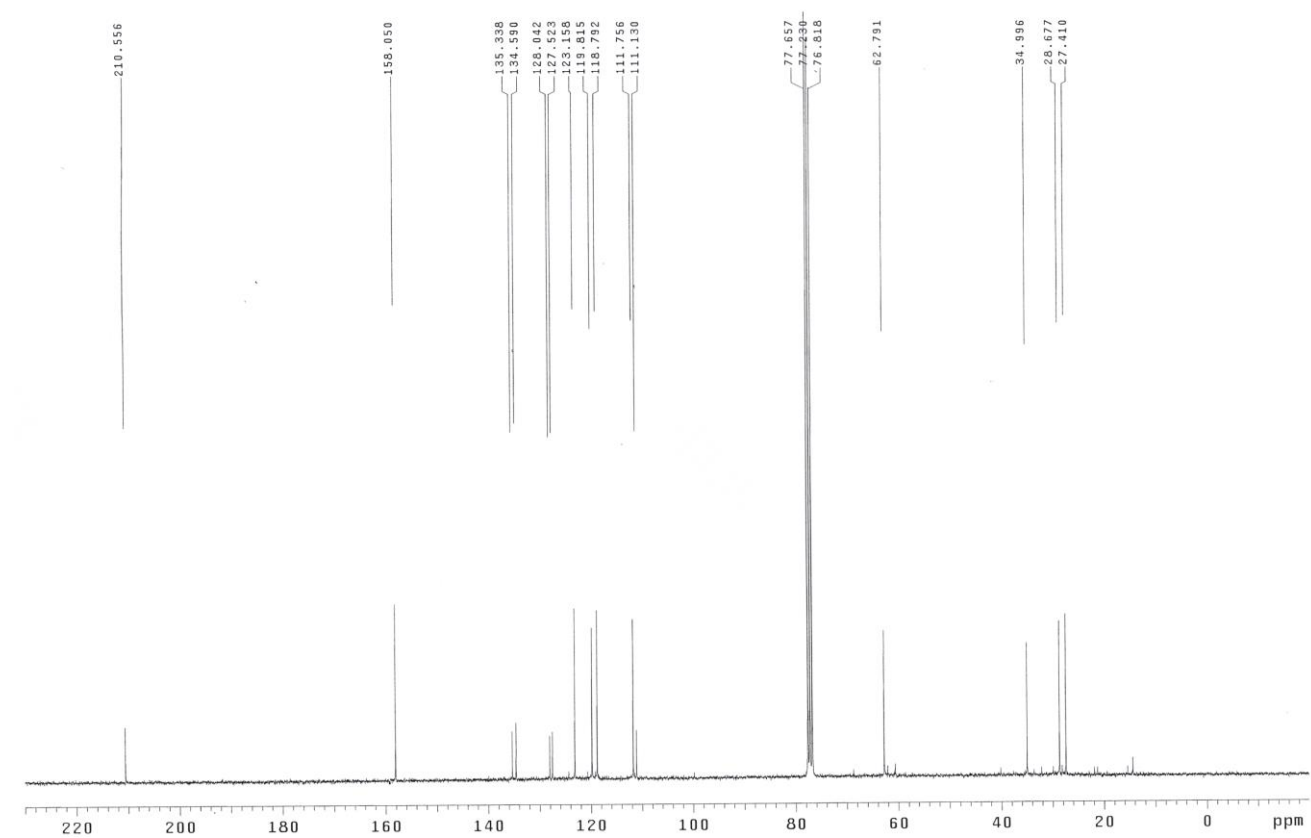

**(E)-2-[2-(5-[(Methylsulfonyl)oxy]imino)cyclopent-1-en-1-yl]-1H-indol-3-yl]ethyl Methanesulfonate (11)**

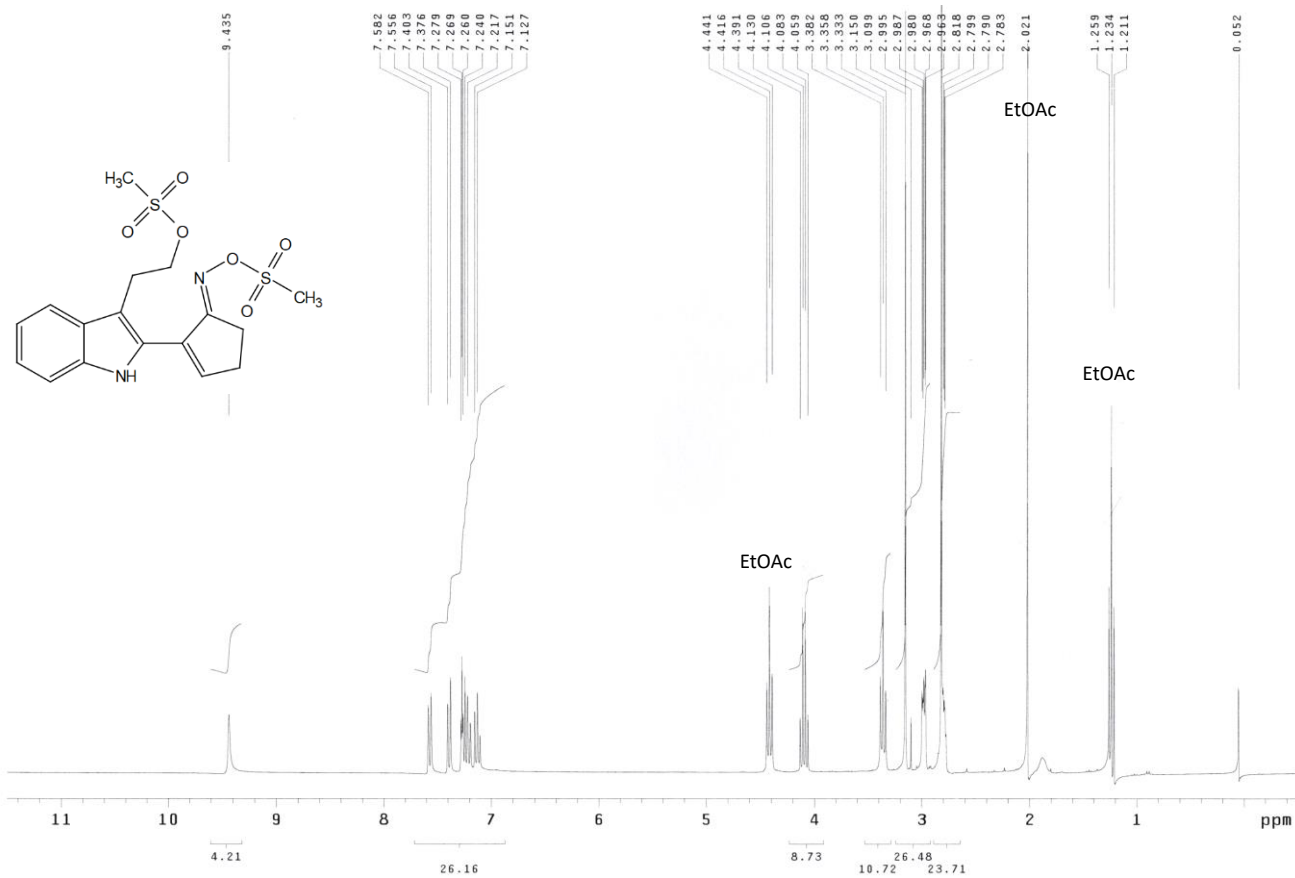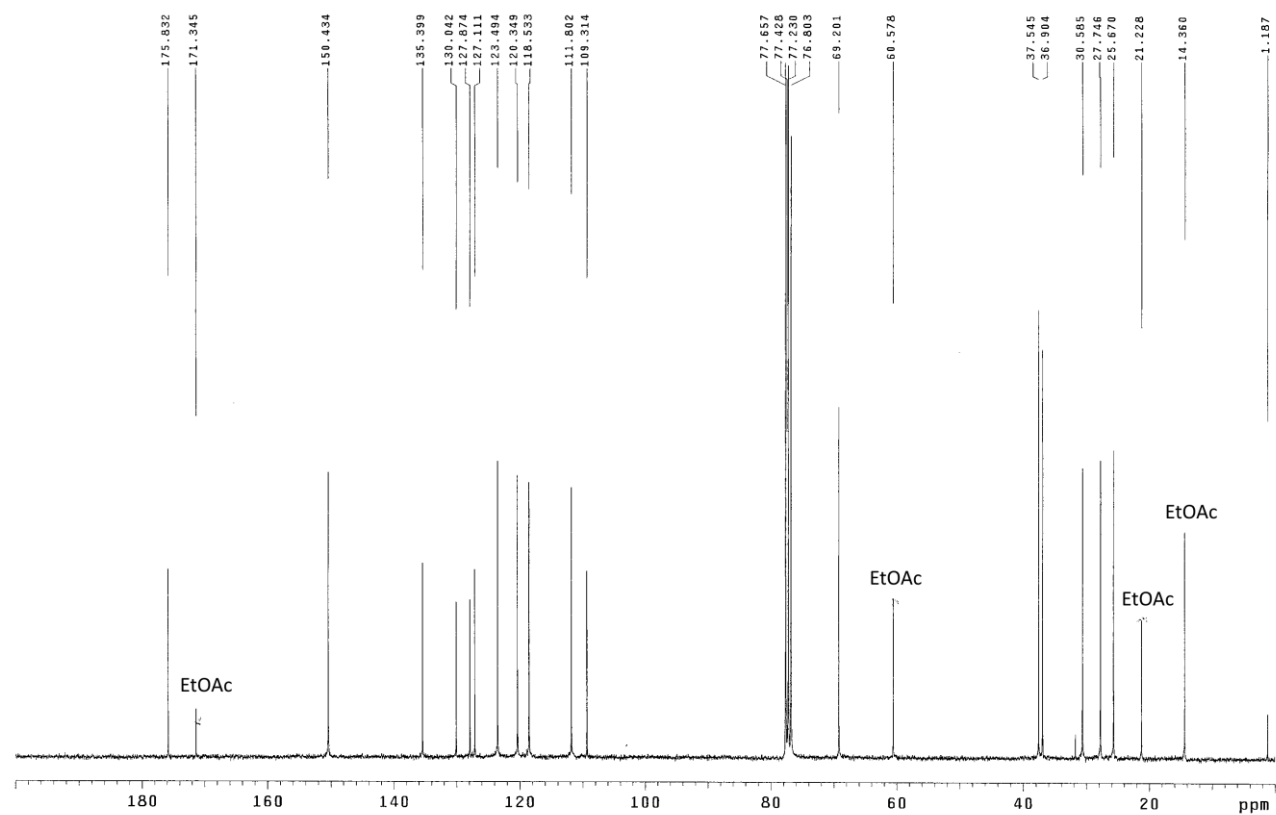

**1-Ethoxy-2,3-dihydro-1*H*-spiro[cyclopenta[3,4]pyrazolo[1,5-*a*]indole-10,1'-cyclopropane] (6a)**

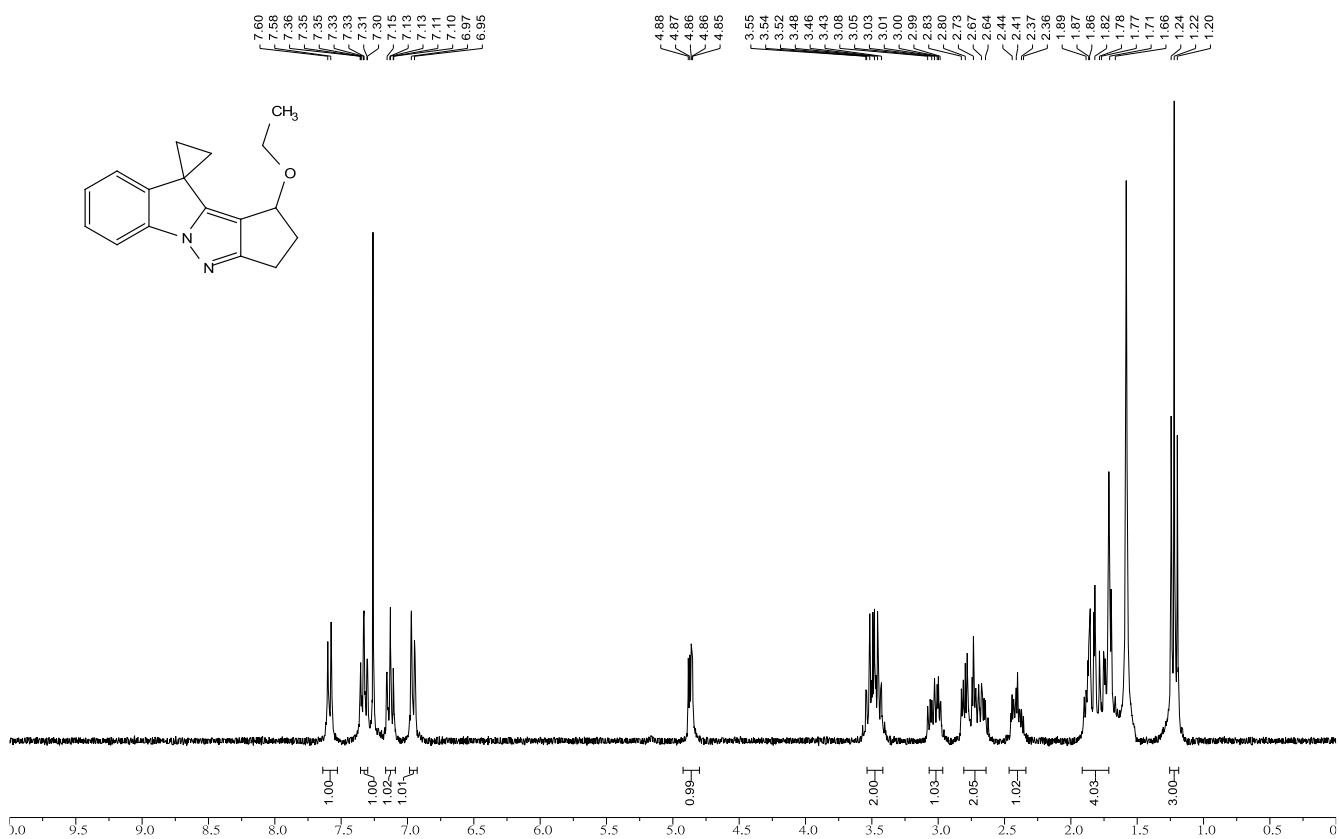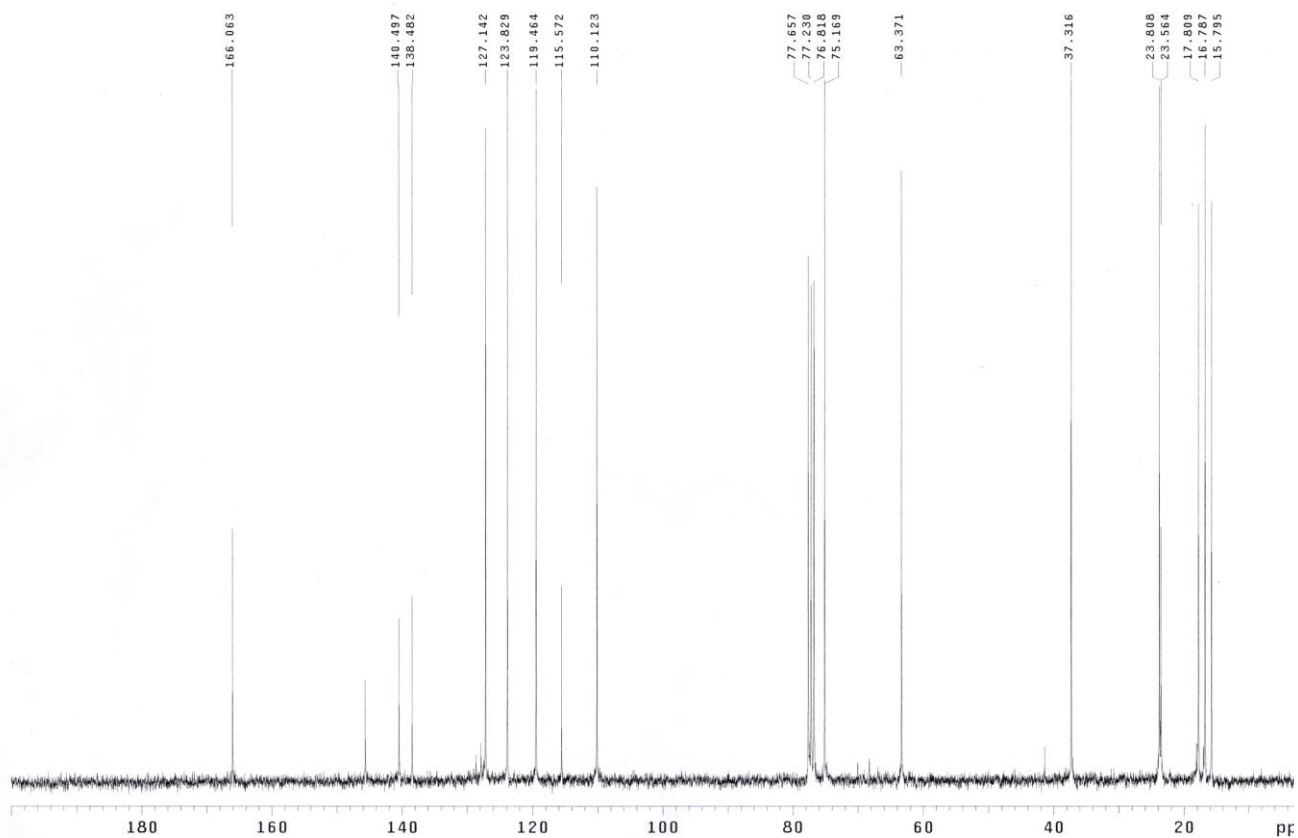

# 1-Propoxy-2,3-dihydro-1*H*-spiro[cyclopenta[3,4]pyrazolo[1,5-*a*]indole-10,1'-cyclopropane] (6b)

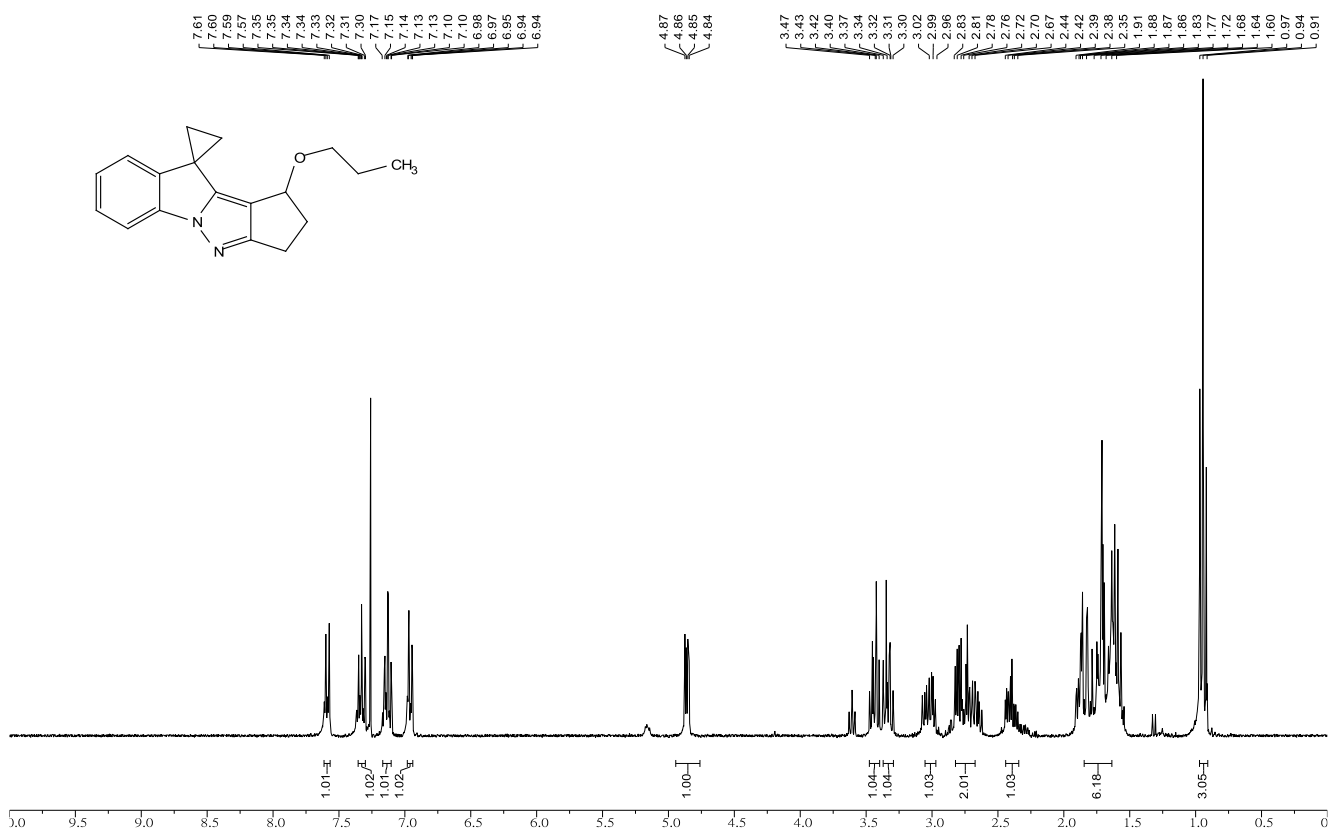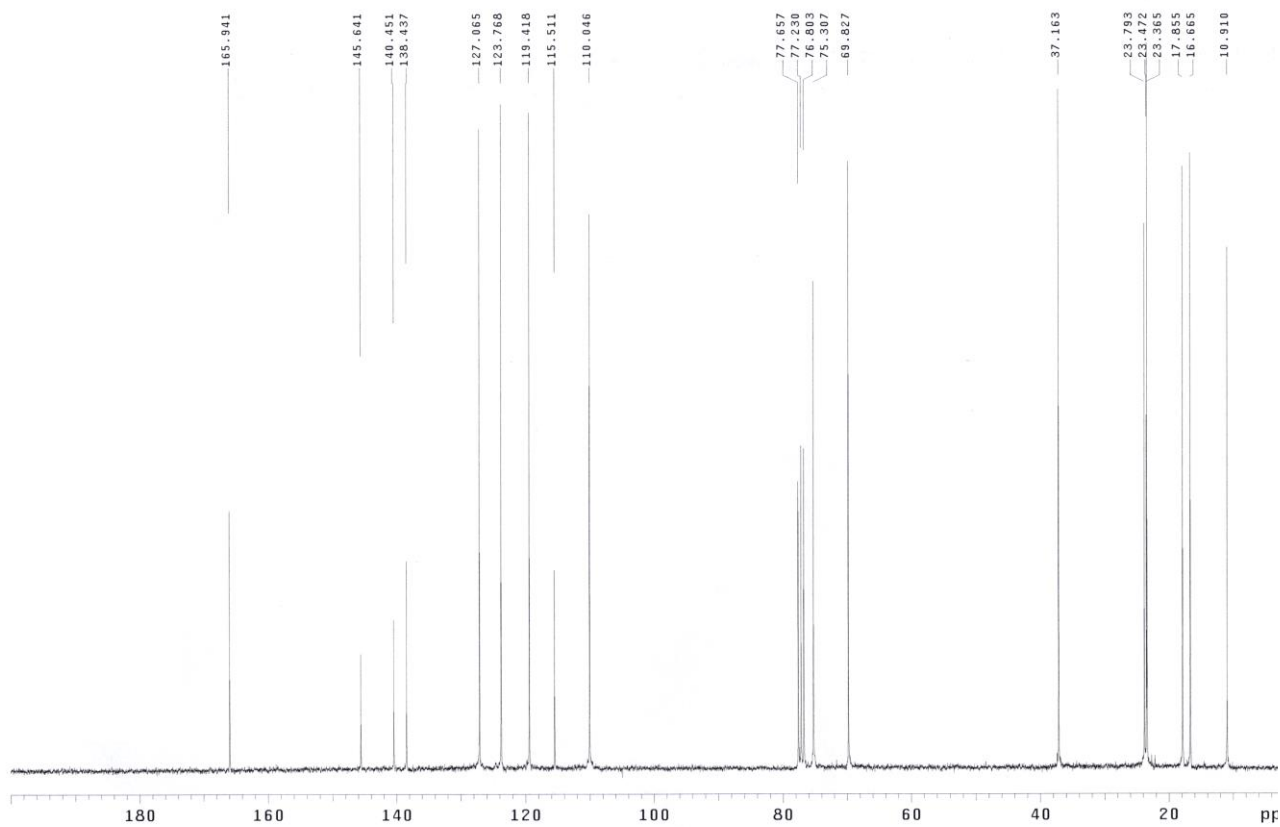

**1-(*Tert*-butoxy)-2,3-dihydro-1*H*-spiro[cyclopenta[3,4]pyrazolo[1,5-*a*]indole-10,1'-cyclopropane] (6c)**

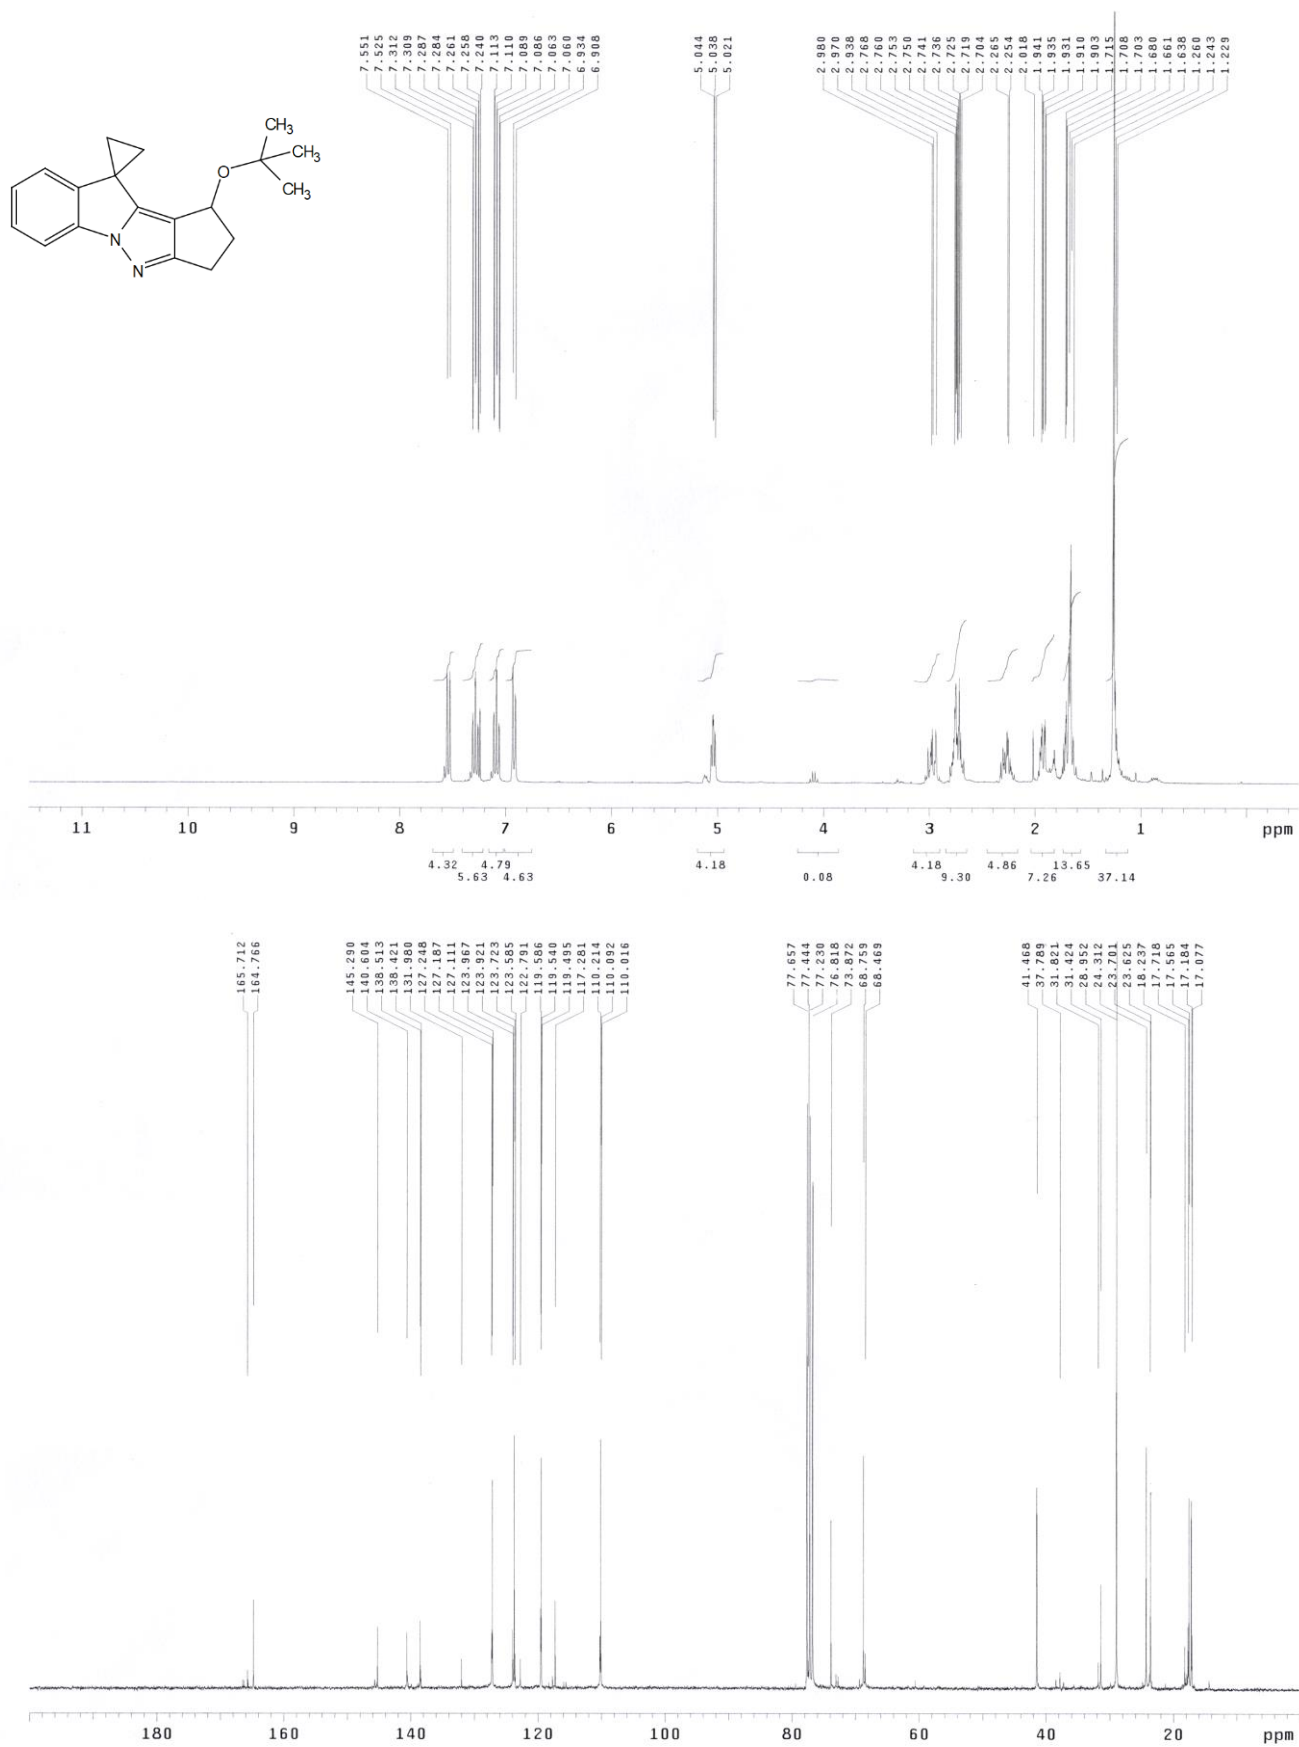

**1-(Benzyloxy)-2,3-dihydro-1*H*-spiro[cyclopenta[3,4]pyrazolo[1,5-*a*]indole-10,1'-cyclopropane] (6d)**

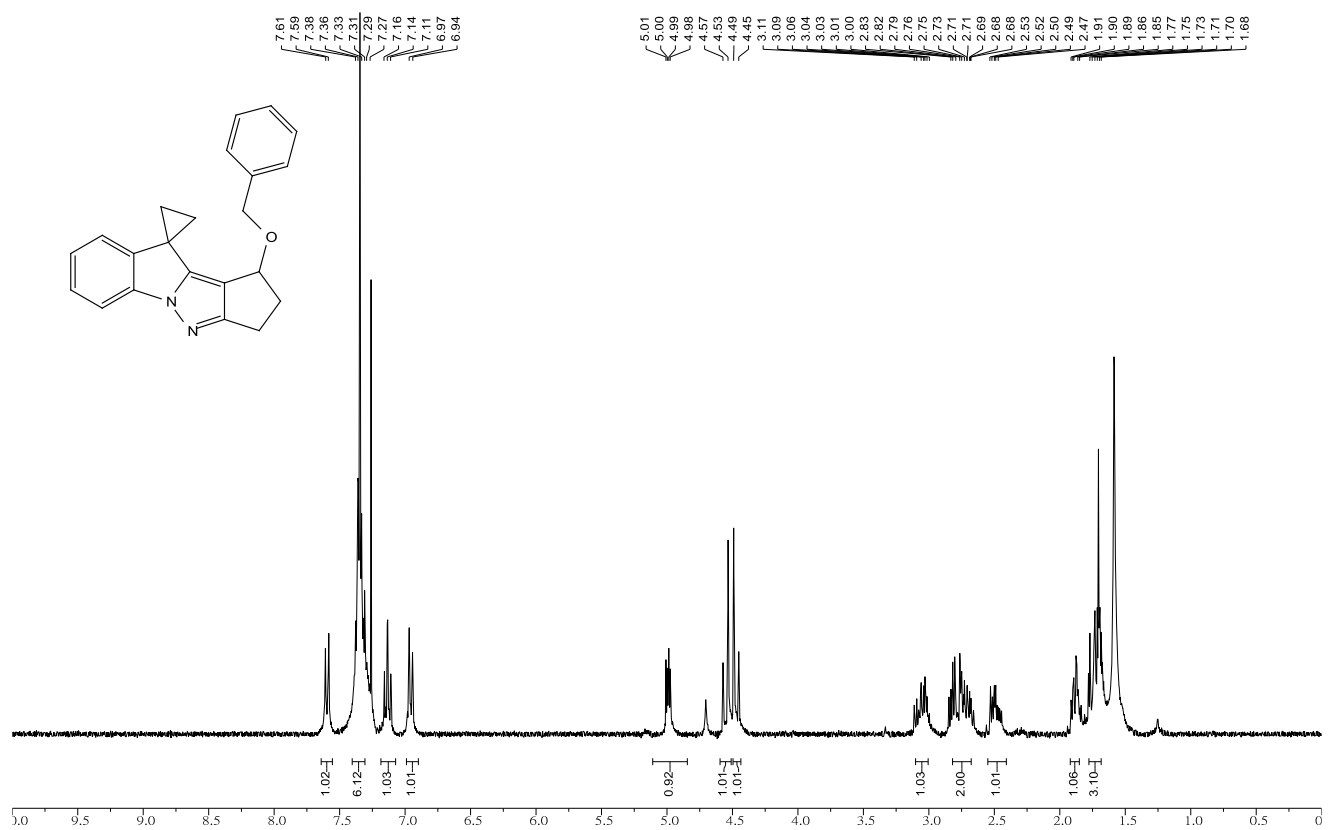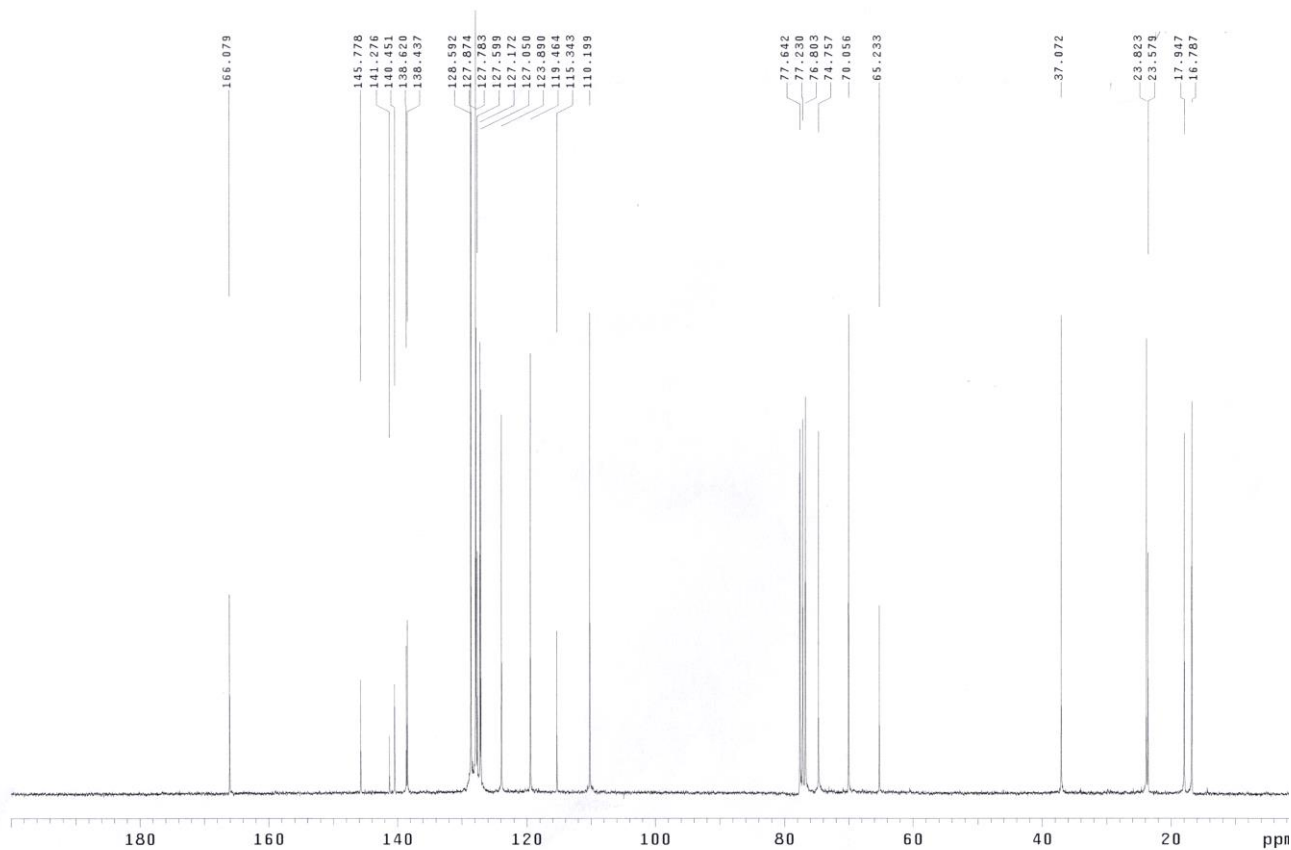

7.547  
7.292  
7.288  
7.266  
7.240  
7.237  
7.219  
7.186  
7.164  
7.039  
7.036  
6.805  
6.880  
5.687  
5.684  
5.577  
5.554  
5.536  
5.533  
5.528  
5.576  
5.573  
5.556  
5.552  
5.548  
5.548  
5.533  
5.528  
5.501  
5.498  
4.845  
4.834  
4.823  
4.817  
3.854  
3.838  
3.834  
3.820  
3.818  
3.003  
2.891  
2.864  
2.842  
2.826  
2.756  
2.744  
2.741  
2.727  
2.715  
2.712  
2.674  
2.663  
2.644  
2.621  
2.619  
2.599  
2.590  
2.570  
2.570  
2.400  
2.393  
2.380  
2.365  
2.351  
2.336  
2.320  
2.320  
2.255  
1.841  
1.838  
1.834  
1.826  
1.823  
1.813  
1.793  
1.788  
1.746  
1.711  
1.686  
1.673  
1.649  
1.630

expl stidh  
SAMPLE  
date Jun 29 2012 dfrq 300.055  
solvent CDCl3 dn H1  
file exp dpwr 30  
ACQUISITION  
sfrq 300.055 da nnn  
tn H1 dnm c  
at 2.668 dmf 200  
np 25590  
sw 4796.2 lb 0.10  
fb 2600 wtfile  
bs 4 proc ft  
tpwr 60 fn not used  
p1 9.2  
d1 1.000 werr  
tof 308.9 wexp wft  
nt 32 wbs wft  
ct 32 wnt  
alock  
gain not used  
FLAGS  
il n  
in n  
dp y  
DISPLAY

DEC. & VT  
H1  
30  
0  
nnn  
c  
200  
ft  
not used  
werr  
wft  
wft  
not used  
n  
n  
y

4.50 15.21 9.12 4.75 10.36 4.93 10.42 5.19 35.53

ppm

C=CCO[C@H]1CCc2nc3c(c1)C4C=CC=CC=C4N3C2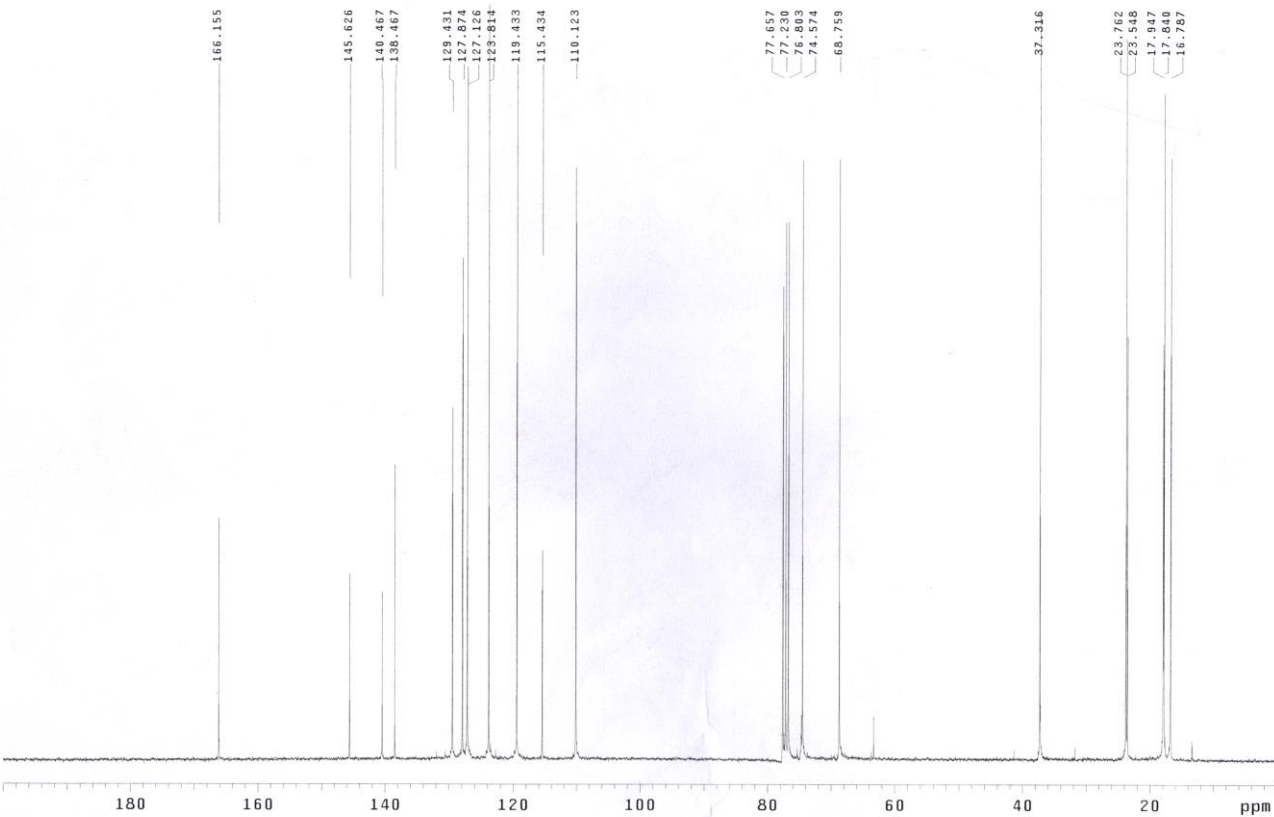

Supplement: s1 [file s1]
